# Supplementary material for: The ubiquitin ligase HOIL-1L regulates immune responses by interacting with linear ubiquitin chains
Source: PubMed Central journal article supplement — iScience. 2021 Oct 8;24(11):103241. doi: 10.1016/j.isci.2021.103241 (PMC8561004; doi:10.1016/j.isci.2021.103241), 2021-10-08
Supplement: mmc1.pdf [file mmc1.pdf]

**Supplemental information**

**The ubiquitin ligase HOIL-1L regulates  
immune responses by interacting  
with linear ubiquitin chains**

**Carlos Gomez-Diaz, Gustav Jonsson, Katrin Schodl, Luiza Deszcz, Annika Bestehorn, Kevin Eislmayr, Jorge Almagro, Anoop Kavirayani, Mayu Seida, Lilian M. Fennell, Astrid Hagelkruys, Pavel Kovarik, Josef M. Penninger, and Fumiyo Ikeda**

A

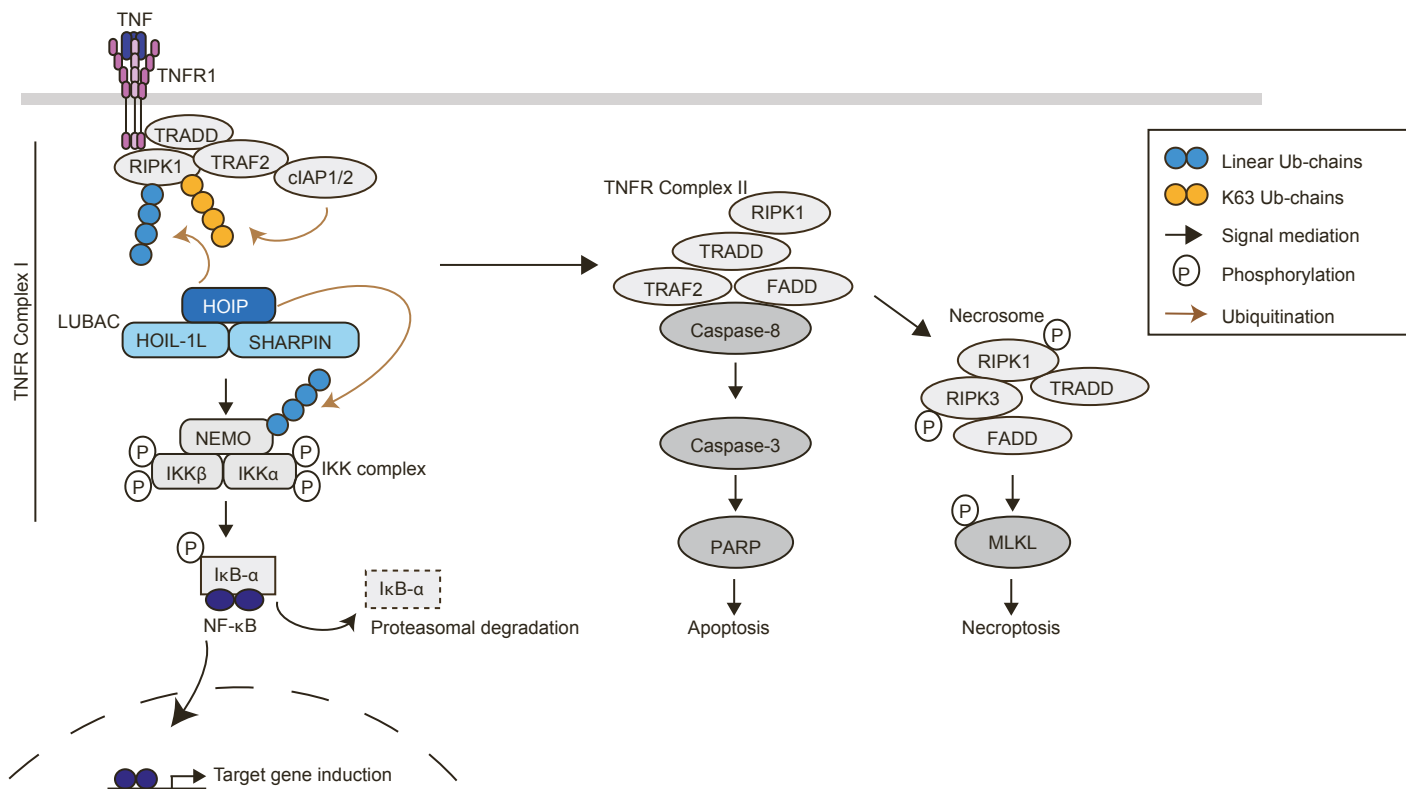

B

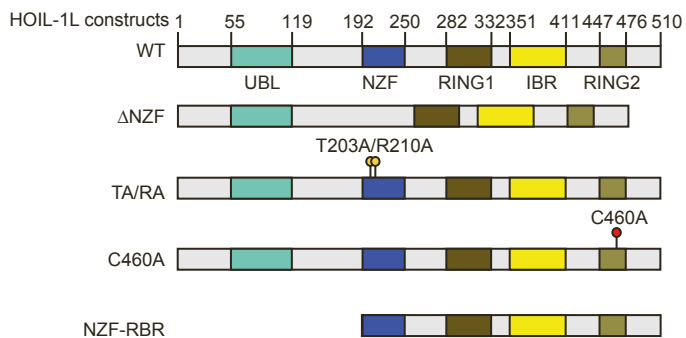

C

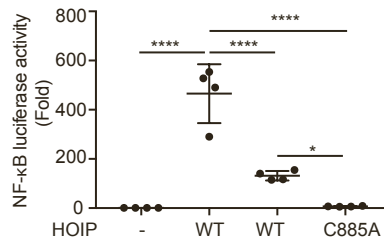

D

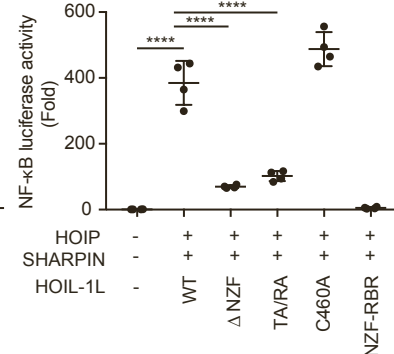

E

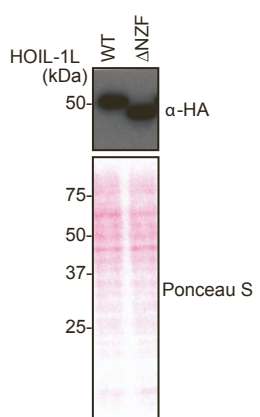

F

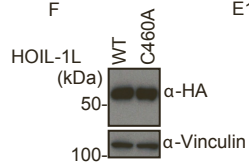

G

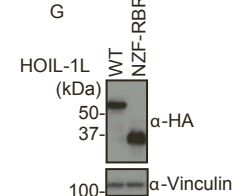

H

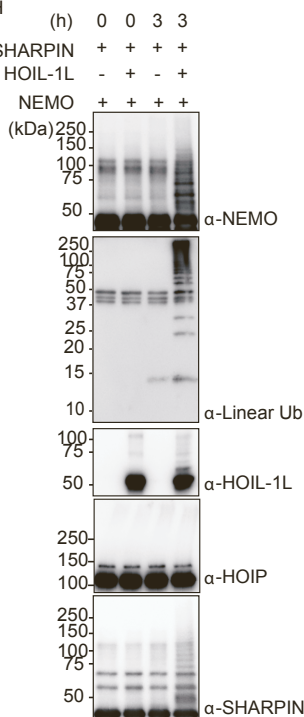

A

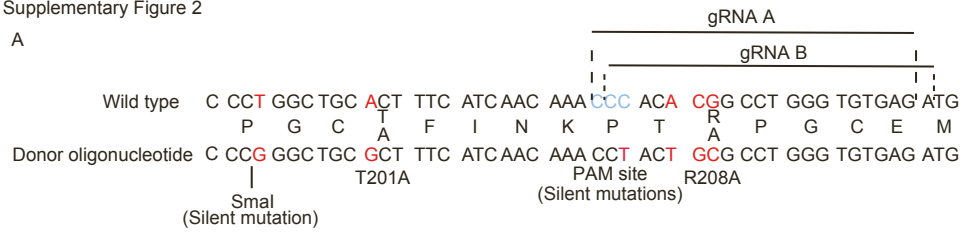

B

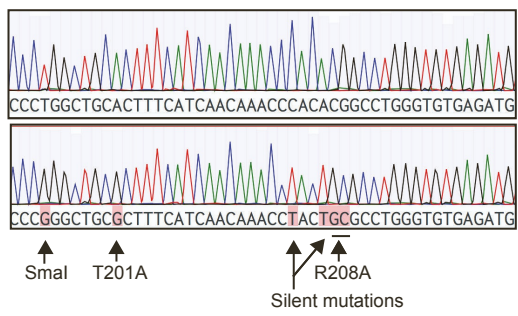

C

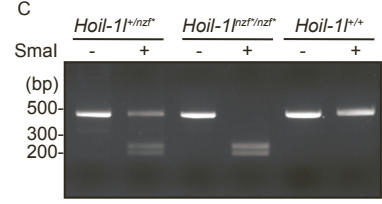

D

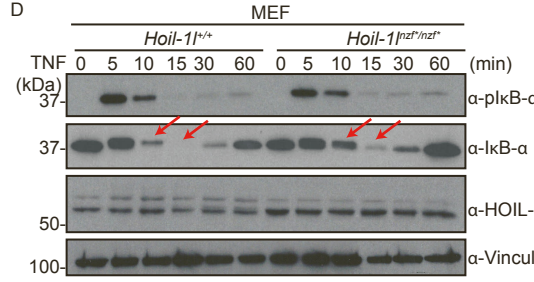

E

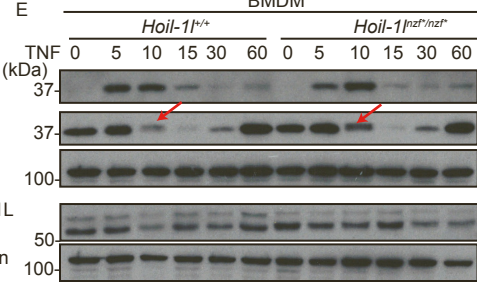

F

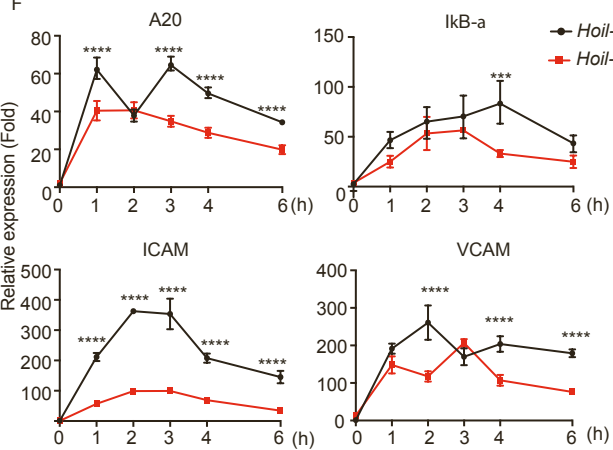

G

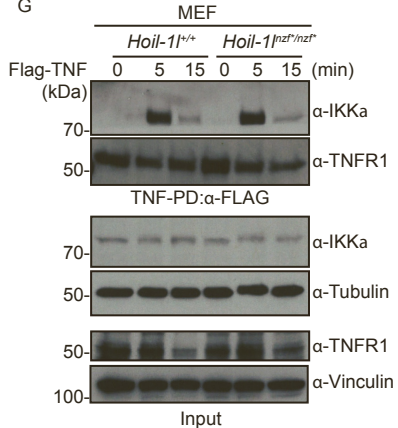

H

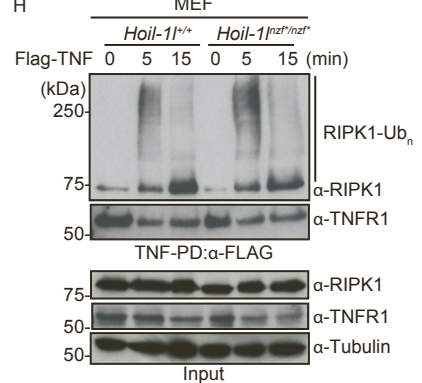

I

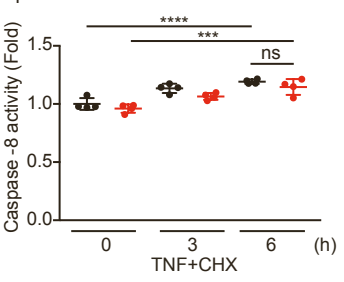

J

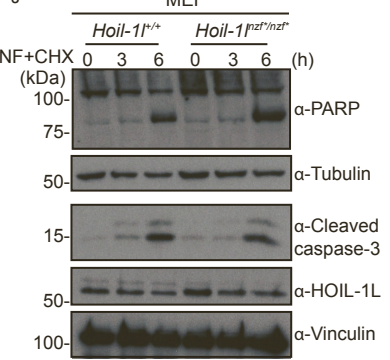

Supplementary Figure 3

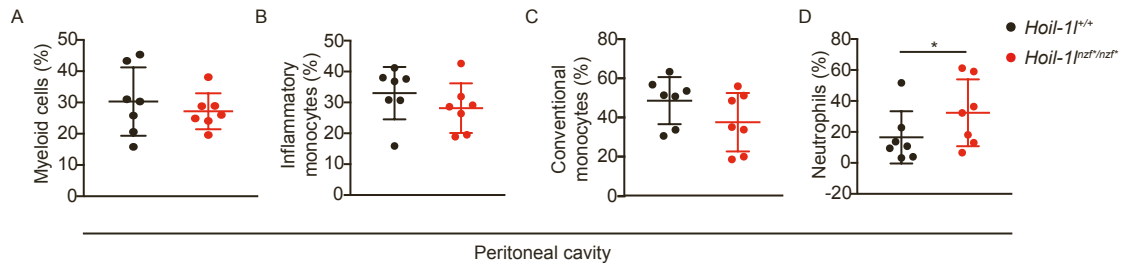

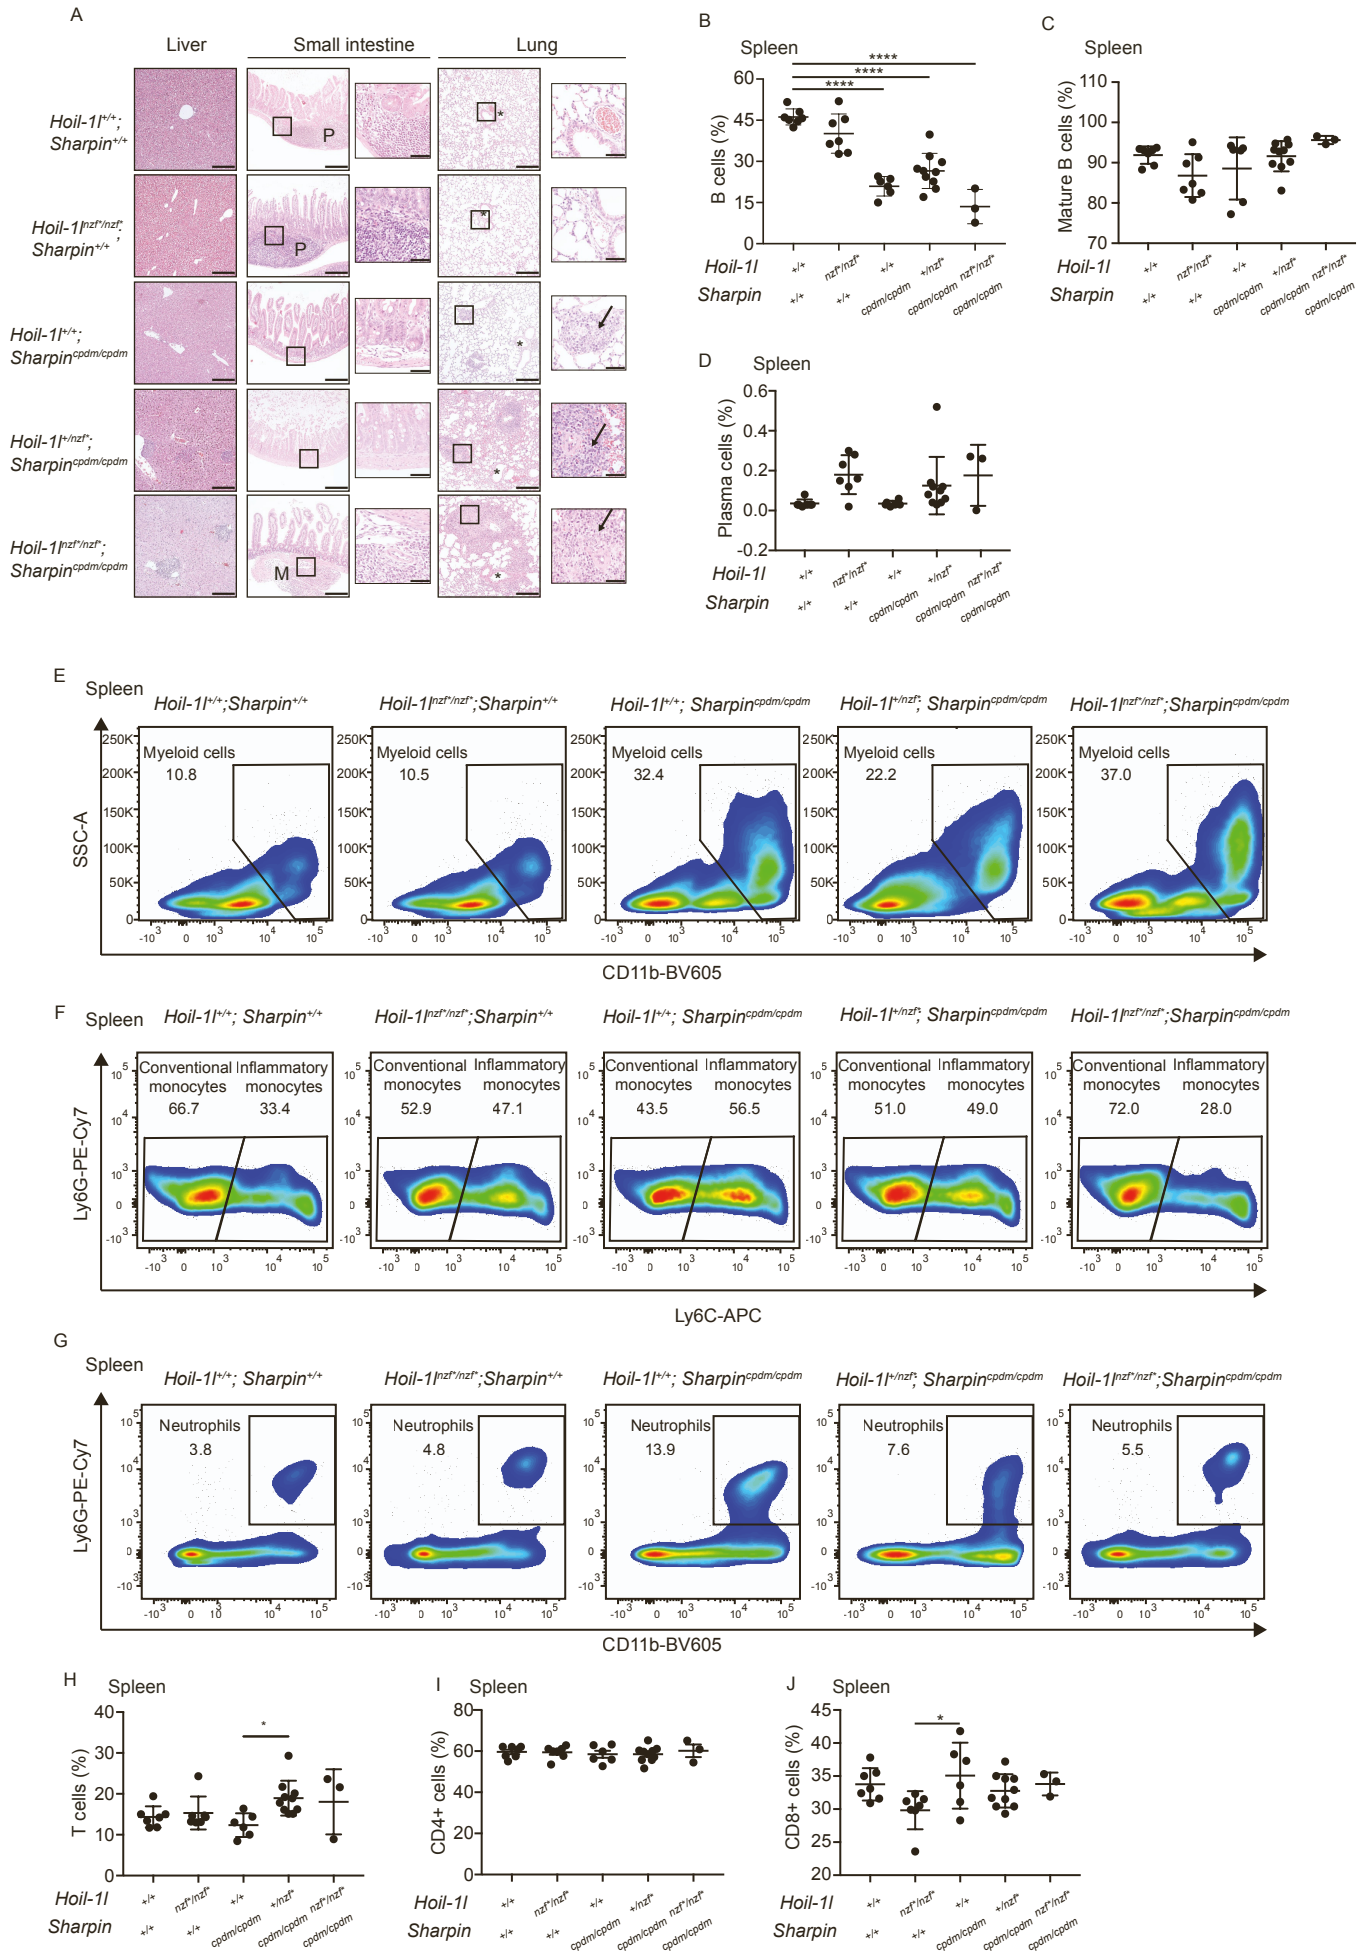

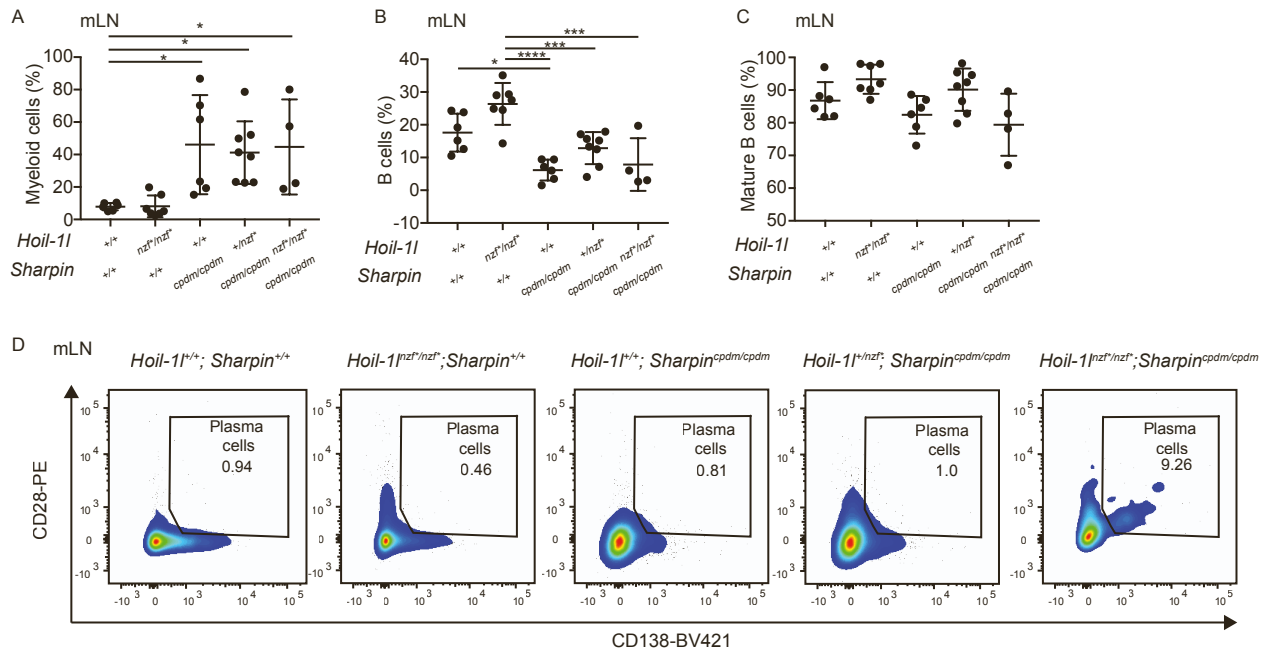

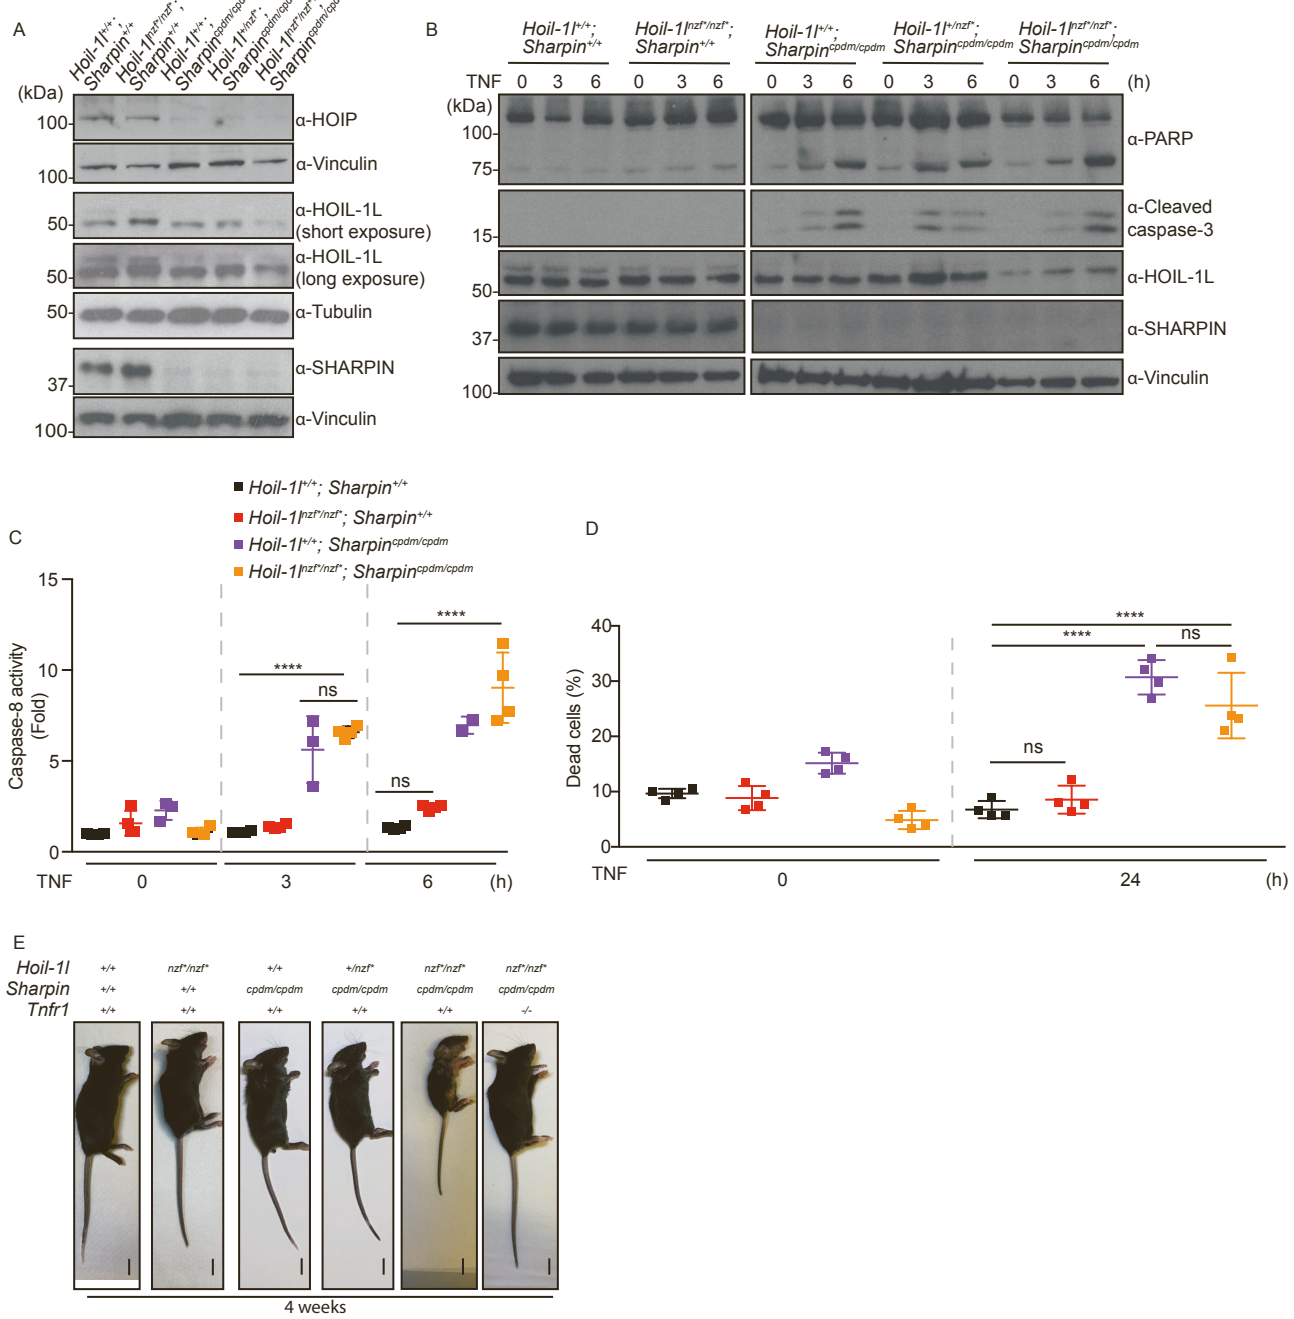

**Supplementary Figure 1, related to Figure 1. Thr203 and Ala210 of HOIL-1L-NZF are important to mediate interaction with linear ubiquitin chains and to activate the NF- $\kappa$ B pathway.**

**A.** Schematic of the TNF-TNFR1 signaling pathway.

**B.** Schematic representation of the human HOIL-1L constructs used in the study.

**C.** NF- $\kappa$ B reporter assay using lysates of HEK293T cells co-transfected with NF- $\kappa$ B reporter and Renilla-expression plasmids with Myc-HOIP (WT or C885A) and HOIL-1L-HA (WT or TA/RA) plasmids.

**D.** NF- $\kappa$ B reporter assay using lysates of HEK293T cells co-transfected with NF- $\kappa$ B reporter and Renilla-expression plasmids with Myc-HOIP (WT), Flag-SHARPIN (WT) and HOIL-1L-HA (WT or the indicated mutants) plasmids.

**E-G.** Immunoblotting to detect expression levels of HOIL-1L- $\Delta$ NZF-HA (a mutant lacking the linear ubiquitin chain-binding domain), HOIL-1L-C460A-HA (an inactive mutant) and HOIL-1L-NZF-RBR-HA overexpressed in HEK293T cells.  $\alpha$ -HA antibody was used to detect the HOIL-1L constructs and ponceau staining (E) or  $\alpha$ -Vinculin antibody (F-G) were used to monitor the loading amount.

**H.** In vitro ubiquitination assays using the recombinant proteins of ubiquitin (Ub), Ube1 (E1), E2 (UbcH7), HOIP, HOIL-1L WT and NEMO. The different components were incubated at 37°C for 3 hours. Linear ubiquitin chain formation and modifications of NEMO, HOIP HOIL-1L and SHARPIN were detected by immunoblotting with the indicated antibodies.

**Data information.** (C-H) Data are representative of at least three independent experiments. (C and D) Data are represented as mean  $\pm$ SD, ANOVA, n=4, \* p-value  $\leq$ 0.05, \*\*\*\*p-value  $\leq$ 0.0001.



**Supplementary Figure 2, related to Figure 2. The linear ubiquitin chain recognition of HOIL-1L contributes to TNF-induced NF- $\kappa$ B dependent gene induction.**

**A.** Targeting strategy to generate the *Hoil-1l*<sup>T201A;R208A/T201A;R208A</sup> (*Hoil-1l*<sup>nzf\*/nzf\*</sup>) mice by CRISPR/Cas9. Cas9 mRNA, gRNA and a donor single-stranded oligonucleotide were injected into the cytosol of zygotes. Threonine 201 and Arginine 208 were mutated to Alanine respectively. For genotyping purposes, a silent mutation generating a SmaI restriction site was introduced. Two additional silent mutations were introduced to avoid re-editing of the DNA by Cas9 after homology-directed repair.

**B.** Sanger Sequencing results corresponding to the targeted region in WT (upper panel) and *Hoil-1l*<sup>nzf\*/nzf\*</sup> (lower panel) mice.

**C.** Genotyping results of *Hoil-1l*<sup>+/+</sup>, *Hoil-1l*<sup>+/nzf\*</sup> and *Hoil-1l*<sup>nzf\*/nzf\*</sup> mice. PCR products of genomic DNA isolated from the respective mice were digested with SmaI. *Hoil-1l*<sup>+/+</sup> has no digested alleles, *Hoil-1l*<sup>+/nzf\*</sup> has one allele digested, and *Hoil-1l*<sup>nzf\*/nzf\*</sup> has both alleles digested.

**D and E.** Immunoblotting to assess phosphorylation and degradation of I $\kappa$ B- $\alpha$  upon TNF treatment (20ng/ml) for the indicated time points in MEFs (D) and BMDMs (E) derived from *Hoil-1l*<sup>+/+</sup> and *Hoil-1l*<sup>nzf\*/nzf\*</sup> mice.

**F.** mRNA levels of NF- $\kappa$ B targets (A20, I $\kappa$ B- $\alpha$ , ICAM and VCAM) determined by qRT-PCR in *Hoil-1l*<sup>+/+</sup> and *Hoil-1l*<sup>nzf\*/nzf\*</sup> MEFs treated with mTNF (20 ng/ml) for the indicated timepoints. Normalization to  $\beta$ -actin.

**G and H.** Immunoblotting to assess TNFR Complex I formation in *Hoil-1l*<sup>+/+</sup> and *Hoil-1l*<sup>nzf\*/nzf\*</sup> MEFs treated with hTNF (100 ng/ml). Total cell lysates (Input) and immunoprecipitates (IP:  $\alpha$ -FLAG) were subjected to SDS-PAGE. Recruitment of IKK $\alpha$  (G) and RIPK1 (H) was monitored by immunoblotting.  $\alpha$ -Tubulin antibody was used to monitor loading amount.

**I.** Caspase-8 activity in *Hoil-1l*<sup>+/+</sup> and *Hoil-1l*<sup>nzf\*/nzf\*</sup> MEFs treated with mouse TNF (100ng/ml) and cycloheximide (CHX) (1ug/ml) for the indicated timepoints.

**J.** Immunoblotting to detect levels of TNF-induced cleaved-PARP and cleaved-caspase3 in *Hoil1l*<sup>+/+</sup> and *Hoil-1l*<sup>nzf\*/nzf\*</sup>\_MEFs treated with mTNF (100ng/ml) and cycloheximide (CHX) (1ug/ml) for the indicated timepoints.  $\alpha$ -Tubulin and  $\alpha$ -Vinculin antibodies were used to monitor loading amount.

**Data information.** Data are representative of at least three independent experiments. (F, I) Data are represented as mean  $\pm$ SD, ANOVA \*\*p-value  $\leq$ 0.01, \*\*\*\*p-value  $\leq$ 0.0001. (F) n=3, (I) n=4.

**Supplementary Figure 3, related to Figure 4. Normal levels of myeloid cell populations are observed in *Hoil-1l*<sup>nzf\*/nzf\*</sup> mice after LPS-induced shock.**

**A-D.** Frequencies of the indicated immune cell types determined by flow cytometry in the peritoneal exudate of *Hoil-1l*<sup>+/+</sup> (n=7) and *Hoil-1l*<sup>nzf\*/nzf\*</sup> (n=7) mice subjected to an LPS challenge for 12 hours. Myeloid cells are defined as CD11b<sup>+</sup>, inflammatory monocytes as CD11c<sup>-</sup> CD11b<sup>+</sup> Ly6G<sup>-</sup> Ly6C<sup>+</sup>, conventional monocytes as CD11c<sup>-</sup> CD11b<sup>+</sup> Ly6G<sup>-</sup> Ly6C<sup>-</sup> and neutrophils as CD11b<sup>hi</sup> Ly6G<sup>+</sup>. Frequencies are calculated based on viable CD45<sup>+</sup> cells (**A, D**) or viable CD45<sup>+</sup> CD11b<sup>+</sup> cells (**B, C**)

**Data information.** Data are represented as mean  $\pm$ SD, ANOVA, \*p-value  $\leq$ 0.05.

**Supplementary Figure 4, related to Figure 5. *Hoil-1l*<sup>nzf\*/nzf\*</sup>; *Sharpin*<sup>cpdm/cpdm</sup> mice show systemic inflammation and a distinctive immune cell composition in the spleen.**

**A.** H&E staining of liver, small intestine and lung from 4-week-old mice of the indicated genotypes. P is Peyer's patches. M indicates site of mesenteric inflammation. \* indicates a bronchiole. Scale bar: 200 $\mu$ m.

**B-D.** Percentage of viable B cells (CD19<sup>+</sup>) out of viable CD45<sup>+</sup> cells (**B**), percentage of mature B cells (CD45<sup>+</sup> CD19<sup>+</sup> CD93<sup>-</sup>) out of viable CD45<sup>+</sup> CD19<sup>+</sup> B cells (**C**), percentage of plasma cells (CD138<sup>+</sup> CD28<sup>+</sup>) out of viable B220<sup>+</sup> Lin<sup>-</sup> B cells (**D**) in the spleen of 4-week-old mice from the indicated genotypes examined by flowcytometry. The lineage (Lin) cocktail consists of TCR $\beta$ , DX5, CD11b and CD23.

**E.** Representative flow cytometry plots for myeloid cells (CD11b<sup>+</sup>) out of viable CD45<sup>+</sup> cells in the spleen from 4-week-old mice of the indicated genotypes.

**F.** Representative flow cytometry plots for inflammatory monocytes (CD11c<sup>-</sup> Ly6G<sup>-</sup> Ly6C<sup>+</sup>) and conventional monocytes (CD11c<sup>-</sup> Ly6G<sup>-</sup> Ly6C<sup>-</sup>) out of viable CD45<sup>+</sup> CD11b<sup>+</sup> cells in the spleen from 4-week-old mice of the indicated genotypes.

**G.** Representative flow cytometry plots for neutrophils (Ly6G<sup>+</sup> CD11b<sup>hi</sup>) out of viable CD45<sup>+</sup> cells in the spleen from 4-week-old mice of the indicated genotypes.

**H-J.** Percentage of viable T cells (TCR $\beta$ <sup>+</sup>) out of viable CD45<sup>+</sup> cells (**H**), percentage of CD4<sup>+</sup> T cells out of viable TCR $\beta$ <sup>+</sup> T cells (**I**), percentage of CD8<sup>+</sup> T cells out of viable TCR $\beta$ <sup>+</sup> T cells (**J**) in the spleen from 4-week-old mice of the indicated genotypes examined by flow cytometry.

**Data information.** Data are represented as mean  $\pm$ SD, ANOVA, \*p-value  $\leq$ 0.05, \*\*\*\*p-value  $\leq$ 0.0001. *Hoil-1l*<sup>+/+</sup>; *Sharpin*<sup>+/+</sup> (n=7), *Hoil-1l*<sup>nzf\*/nzf\*</sup>; *Sharpin*<sup>+/+</sup> (n=7), *Hoil-1l*<sup>+/+</sup>; *Sharpin*<sup>cpdm/cpdm</sup> (n=6), *Hoil-1l*<sup>+/nzf\*</sup>; *Sharpin*<sup>cpdm/cpdm</sup> (n=10), *Hoil-1l*<sup>nzf\*/nzf\*</sup>; *Sharpin*<sup>cpdm/cpdm</sup> (n=3).

**Supplementary Figure 5, related to Figure 5. *Hoil-1<sup>nzf\*/nzf\*</sup>*; *Sharpin<sup>cpdm/cpdm</sup>* mice show systemic inflammation and a distinctive immune cell composition in the mLN.**

**A-C.** Frequency of viable myeloid cells (viable CD45<sup>+</sup> CD11b<sup>+</sup> cells) (**A**), B cells (CD19<sup>+</sup>) out of viable CD45<sup>+</sup> (**B**), mature B cells (CD19<sup>+</sup> CD93<sup>-</sup>) out of viable CD45<sup>+</sup> CD19<sup>+</sup> (**C**) in the mLN from 4-week-old mice of the indicated genotypes examined by flow cytometry.

**D.** Representative flow cytometry plots for plasma cells (CD138<sup>+</sup> CD28<sup>+</sup>) out of viable B220<sup>+</sup> Lin<sup>-</sup> cells in the mesenteric lymph nodes (mLN) from 4-week-old mice of the indicated genotypes. The lineage (Lin) cocktail consists of TCR $\beta$ , DX5, CD11b and CD23.

**Data information.** Data are represented as mean  $\pm$ SD, ANOVA, \*p-value  $\leq$ 0.05, \*\*\*p-value  $\leq$ 0.001, \*\*\*\*p-value  $\leq$ 0.0001. *Hoil-1<sup>+/+</sup>*; *Sharpin<sup>+/+</sup>* (n=6), *Hoil-1<sup>nzf\*/nzf\*</sup>*; *Sharpin<sup>+/+</sup>* (n=7), *Hoil-1<sup>+/+</sup>*; *Sharpin<sup>cpdm/cpdm</sup>* (n=6), *Hoil-1<sup>+/nzf\*</sup>*; *Sharpin<sup>cpdm/cpdm</sup>* (n=8), *Hoil-1<sup>nzf\*/nzf\*</sup>*; *Sharpin<sup>cpdm/cpdm</sup>* (n=4).

**Supplementary Figure 6, related to Figure 6. *Hoil-1<sup>nzf\*/nzf\*</sup>*; *Sharpin<sup>cpdm/cpdm</sup>* MEFs are not further sensitized to TNF-induced cell death in comparison to *Sharpin<sup>cpdm/cpdm</sup>* MEFs .**

**A.** Immunoblotting to assess the expression levels of LUBAC components in MEFs from the indicated genotypes.

**B.** Immunoblotting to detect levels of TNF-induced cleaved-PARP and cleaved-caspase3 in MEFs from the indicated genotypes treated with mTNF (100 ng/ml).

**C.** Caspase-8 activity in MEFs from the indicated genotypes treated with mouse TNF (100 ng/ml) for the indicated timepoints.

D. Percentage of eFluor780 (viability dye) positive MEFs (Dead cells) from the indicated genotypes after 24 hours of mTNF (100 ng/ml) stimulation.

E. Gross appearance picture of 4-week-old mice from the indicated genotypes. Scale bar: 10 mm.

**Data information.** Data are representative of at least three independent experiments (A-D). Data are represented as mean  $\pm$ SD, ANOVA, \*p-value  $\leq$ 0.05, \*\*\*p-value  $\leq$ 0.001, \*\*\*\*p-value  $\leq$ 0.0001.

(C and D) *Hoil-1l*<sup>+/+</sup>; *Sharpin*<sup>+/+</sup> (n=4), *Hoil-1l*<sup>nzf\*/nzf\*</sup>; *Sharpin*<sup>+/+</sup> (n=4), *Hoil-1l*<sup>+/+</sup>; *Sharpin*<sup>cpdm/cpdm</sup> (n=4), *Hoil-1l*<sup>nzf\*/nzf\*</sup>; *Sharpin*<sup>cpdm/cpdm</sup> (n=4).
